# Supplementary material
Source: PubMed Central journal article supplement (PMC5817481)
Supplement: jama-318-525-s002.pdf [file jama-318-525-s002.pdf]

## Supplementary Online Content 2

Bieleninik Ł, Geretsegger M, Mössler K, et al; TIME-A Study Team. Effects of improvisational music therapy vs enhanced standard care on symptom severity among children with autism spectrum disorder: the TIME-A randomized clinical trial. *JAMA*. doi:10.1001/jama.2017.9478

**eTable 1.** Changes to the Study Protocol

**eTable 2.** Baseline Characteristics of Those Observed Versus Those Who Dropped Out at 5 Months

**eFigure 1.** Multidimensional Scaling of Baseline Characteristics by Treatment Group

**eTable 3.** Concomitant Treatments Provided as Part of Enhanced Standard Care

**eTable 4.** Mean Scores of Improvisational Music Therapy and Parent Counselling Principles

**eFigure 2.** Patterns of Improvisational Music Therapy Sessions Received Per Week

**eFigure 3.** ROC Curve for Optimal Treatment Fidelity Cutoffs

**eTable 5.** Linear Mixed-Effects Analyses—All Outcomes, Two Groups

**eTable 6.** Linear Mixed-Effects Analyses—All Outcomes, Three Groups

This supplementary material has been provided by the authors to give readers additional information about their work.

**eTable 1. Changes to the Study Protocol**

| <b>Domain</b>                                 | <b>From</b>                                                            | <b>To</b>                                                                                                                                           | <b>Rationale</b>                                      |
|-----------------------------------------------|------------------------------------------------------------------------|-----------------------------------------------------------------------------------------------------------------------------------------------------|-------------------------------------------------------|
| Population                                    | No prior experience of music therapy                                   | Limited experience of music therapy if that was more than 12 months ago                                                                             | In response to a request from a site                  |
| Baseline data                                 | IQ level assessed by K-ABC or, when not possible, clinical judgment    | IQ level assessed by K-ABC, other standardized test, or, when not possible, clinical judgment                                                       | In response to requests from sites                    |
| Interventions - improvisational music therapy | Music therapists with master degree or equivalent                      | Trained music therapists with a degree that is recognized in the country                                                                            | Not applicable in all countries                       |
| Interventions – improvisational music therapy | No improvisational music therapy offered after completion of the study | At some sites: improvisational music therapy offered after the last wave of data collection (12 months) to those assigned to enhanced standard care | To maintain equipoise                                 |
| Interventions – enhanced standard care        | 3 sessions of parent counseling                                        | At one site: 3 or 10 sessions of parent counseling (balanced across the groups of the trial)                                                        | In response to a request from a site                  |
| Outcomes – primary                            | ADOS Social Communication                                              | ADOS Social Affect                                                                                                                                  | Name change only, to reflect current ADOS terminology |
| Outcomes – secondary                          | --                                                                     | Two 100mm visual analogue scales were added to assess the quality of life of the child and of the family as a whole                                 | Primarily to help with cost-effectiveness analyses    |

**eTable 1. Changes to the Study Protocol (Continued)**

| <b>Domain</b>                      | <b>From</b>                                                  | <b>To</b>                                                                                                                              | <b>Rationale</b>                                                                                                                                   |
|------------------------------------|--------------------------------------------------------------|----------------------------------------------------------------------------------------------------------------------------------------|----------------------------------------------------------------------------------------------------------------------------------------------------|
| Outcomes – time points             | 0, 2, 5, and 12 months                                       | At one site: The 2-months assessment for existing participants was regarded as optional when recruitment of new participants was high. | To avoid waiting times for participants                                                                                                            |
| Statistical analyses – main        | Longitudinal analysis using generalized estimating equations | Longitudinal analysis using linear mixed-effects models                                                                                | Linear mixed-effects models require fewer assumptions (missing at random rather than missing completely at random) and have somewhat better power. |
| Statistical analyses – exploratory | --                                                           | A binary analysis of response (improved/not improved) was added.                                                                       | To identify the proportion who improved.                                                                                                           |
| Statistical analyses – subgroups   | Relevant subgroups “such as” age or ASD subtype              | Age, sex, ASD subtype, verbal ability, ASD severity, IQ level, country, time of enrolment in the study                                 | Implied in the protocol.                                                                                                                           |

*Note. Abbreviations:* ADOS – Autism Diagnostic Observation Schedule; ASD – Autism Spectrum Disorder; IQ – Intelligence Quotient K-ABC – Kaufman Assessment Battery for Children.

**eTable 2. Baseline Characteristics of Those Observed Versus Those Who Dropped Out at 5 Months**

| Characteristics                                        | Followed up at 5 months |             | Dropped out at 5 months |            | P-value |
|--------------------------------------------------------|-------------------------|-------------|-------------------------|------------|---------|
|                                                        | N                       |             | N                       |            |         |
| Age (years), Mean (SD)                                 | 314                     | 5.4 (0.9)   | 50                      | 5.3 (0.9)  | .517    |
| Sex (male), No. (%)                                    | 314                     | 266 (84.7%) | 50                      | 36 (72%)   | .044    |
| Native speaker of the country's main language, No. (%) | 314                     | 275 (87.6%) | 50                      | 46 (92%)   | .507    |
| Education mother, No. (%)                              | 311                     |             | 47                      |            | .562    |
| <12years (less than high school)                       |                         | 33 (10.6%)  |                         | 3 (6.4%)   |         |
| ≥12years (equivalent to high school)                   |                         | 115 (37%)   |                         | 17 (36.2%) |         |
| University                                             |                         | 139 (44.7%) |                         | 25 (53.2%) |         |
| Unknown                                                |                         | 24 (7.7%)   |                         | 2 (4.3%)   |         |
| Education father, No. (%)                              | 307                     |             | 47                      |            | .274    |
| <12years (less than high school)                       |                         | 46 (15%)    |                         | 4 (8.5%)   |         |
| ≥12years (equivalent to high school)                   |                         | 102 (33.2%) |                         | 13 (27.7%) |         |
| University                                             |                         | 125 (40.7%) |                         | 26 (55.3%) |         |
| Unknown                                                |                         | 34 (11.1%)  |                         | 4 (8.5%)   |         |
| Employment mother, No. (%)                             | 311                     |             | 47                      |            | .392    |
| Unemployed or social support                           |                         | 39 (12.5%)  |                         | 9 (19.1%)  |         |
| Working part-time                                      |                         | 80 (25.7%)  |                         | 12 (25.5%) |         |
| Working full time                                      |                         | 55 (17.7%)  |                         | 12 (25.5%) |         |
| Homemaker                                              |                         | 111 (35.7%) |                         | 12 (25.5%) |         |
| Other                                                  |                         | 7 (2.3%)    |                         | 0 (0%)     |         |
| Unknown                                                |                         | 19 (6.1%)   |                         | 2 (4.3%)   |         |
| Employment father, No. (%)                             | 309                     |             | 47                      |            | .715    |
| Unemployed or social support                           |                         | 18 (5.8%)   |                         | 1 (2.1%)   |         |
| Working part-time                                      |                         | 16 (5.2%)   |                         | 2 (4.3%)   |         |
| Working full time                                      |                         | 225 (72.8%) |                         | 39 (83%)   |         |
| Homemaker                                              |                         | 5 (1.6%)    |                         | 0 (0%)     |         |

**eTable 2. Baseline Characteristics of Those Observed Versus Those Who Dropped Out at 5 Months (Continued)**

| Characteristics                               | Followed up at 5 months |             | Dropped out at 5 months |            | P-value |
|-----------------------------------------------|-------------------------|-------------|-------------------------|------------|---------|
|                                               | N                       | Value       | N                       | Value      |         |
| Other                                         |                         | 10 (3.2%)   |                         | 1 (2.1%)   |         |
| Unknown                                       |                         | 35 (11.3%)  |                         | 4 (8.5%)   |         |
| Adults in the household, No. (%)              | 300                     |             | 45                      |            | .343    |
| 1 adult                                       |                         | 44 (14.7%)  |                         | 3 (6.7%)   |         |
| 2 adults                                      |                         | 233 (77.7%) |                         | 38 (84.4%) |         |
| >2 adults                                     |                         | 23 (7.7%)   |                         | 4 (8.9%)   |         |
| Siblings in the family, No. (%)               | 298                     |             | 44                      |            | .423    |
| No siblings                                   |                         | 80 (26.8%)  |                         | 10 (22.7%) |         |
| 1 sibling                                     |                         | 144 (48.3%) |                         | 19 (43.2%) |         |
| >1 sibling                                    |                         | 74 (24.8%)  |                         | 15 (34.1%) |         |
| Diagnosis, No. (%)                            | 314                     |             | 50                      |            | .645    |
| Childhood autism (ICD-10 code F84.0)          |                         | 257 (81.8%) |                         | 44 (88%)   |         |
| Atypical autism (ICD-10 code F84.1)           |                         | 3 (1%)      |                         | 0 (0%)     |         |
| Asperger syndrome (ICD-10 code F84.5)         |                         | 12 (3.8%)   |                         | 2 (4%)     |         |
| PDD (ICD-10 code F84.9) <sup>†</sup>          |                         | 42 (13.4%)  |                         | 4 (8%)     |         |
| Previous music therapy, No. (%)               | 306                     | 9 (2.9%)    | 50                      | 3 (6%)     | .491    |
| ADOS module, No. (%)                          | 314                     |             | 50                      |            | .864    |
| Module 1                                      |                         | 192 (61.1%) |                         | 32 (64%)   |         |
| Module 2                                      |                         | 112 (35.7%) |                         | 17 (34%)   |         |
| Module 3                                      |                         | 10 (3.2%)   |                         | 1 (2%)     |         |
| ADOS Total, Mean (SD)                         | 313                     | 17.6 (5.3)  | 50                      | 18.1 (5)   | .554    |
| ADOS Social Affect, Mean (SD)                 | 314                     | 13.7 (4.4)  | 50                      | 14.1 (4.5) | .569    |
| ADOS Language and Communication, Mean (SD)    | 314                     | 3.3 (1.5)   | 50                      | 3.1 (1.4)  | .318    |
| ADOS Reciprocal Social Interaction, Mean (SD) | 314                     | 10.4 (3.5)  | 50                      | 11 (3.7)   | .285    |

**eTable 2. Baseline Characteristics of Those Observed Versus Those Who Dropped Out at 5 Months (Continued)**

| Characteristics                                                                                 | Followed up at 5 months |             | Dropped out at 5 months |             | P-value |
|-------------------------------------------------------------------------------------------------|-------------------------|-------------|-------------------------|-------------|---------|
|                                                                                                 | N                       | Value       | N                       | Value       |         |
| ADOS Restricted and Repetitive Behavior, Mean (SD)                                              | 313                     | 3.9 (2.1)   | 50                      | 4 (1.6)     | .830    |
| SRS Total, Mean (SD)                                                                            | 310                     | 95.7 (28.1) | 49                      | 98.2 (30.3) | .599    |
| SRS Social Awareness, Mean (SD)                                                                 | 314                     | 12.3 (4.1)  | 49                      | 12.1 (3.7)  | .777    |
| SRS Social Cognition, Mean (SD)                                                                 | 314                     | 18.5 (5.9)  | 50                      | 17.9 (6.4)  | .540    |
| SRS Social Communication, Mean (SD)                                                             | 314                     | 31.9 (9.9)  | 50                      | 33.3 (11.3) | .395    |
| SRS Social Motivation, Mean (SD)                                                                | 314                     | 14.7 (5.7)  | 50                      | 16 (6.2)    | .178    |
| SRS Autistic Mannerisms, Mean (SD)                                                              | 314                     | 17.9 (7.1)  | 50                      | 18.4 (7)    | .660    |
| Quality of life, participant, Mean (SD)                                                         | 307                     | 71.4 (18.7) | 50                      | 72.7 (17.5) | .624    |
| Quality of life, family, Mean (SD)                                                              | 307                     | 68.4 (20.2) | 50                      | 66.7 (17.7) | .557    |
| Parent working reduced hours due to the child's needs (in percent of full-time work), Mean (SD) | 158                     | 69.2 (30.3) | 23                      | 66.6 (32.6) | .714    |
| IQ source, No. (%)                                                                              | 314                     |             | 50                      |             | .161    |
| K-ABC <sup>2</sup>                                                                              |                         | 7 (2.2%)    |                         | 1 (2%)      |         |
| Other standardized test                                                                         |                         | 175 (55.7%) |                         | 35 (70%)    |         |
| Clinical judgment <sup>3</sup>                                                                  |                         | 132 (42%)   |                         | 14 (28%)    |         |

**eTable 2. Baseline Characteristics of Those Observed Versus Those Who Dropped Out at 5 Months (Continued)**

| Characteristics                                        | Followed up at 5 months |             | Dropped out at 5 months |             | P-value |
|--------------------------------------------------------|-------------------------|-------------|-------------------------|-------------|---------|
|                                                        | N                       | Value       | N                       | Value       |         |
| IQ, standardized test, Mean (SD)                       | 178                     | 75.9 (26.3) | 33                      | 72.8 (25.7) | .539    |
| Mental retardation (IQ<70), No. (%) <sup>3</sup>       | 309                     | 144 (46.6%) | 47                      | 21 (44.7%)  | .929    |
| ADI-R A: Reciprocal Social Interaction, Mean (SD)      | 314                     | 18.2 (5.8)  | 50                      | 18.6 (5.5)  | .698    |
| ADI-R B: Language and Communication, Mean (SD)         | 314                     | 13.1 (4.2)  | 50                      | 12.6 (3.9)  | .453    |
| ADI-R C: Repetitive Behaviors and Interests, Mean (SD) | 314                     | 5.9 (2.5)   | 50                      | 5.3 (1.9)   | .032    |
| ADI-R D: Early Onset, Mean (SD)                        | 314                     | 4 (1.1)     | 50                      | 3.8 (1.1)   | .395    |
| Child care, No. (%)                                    | 314                     |             | 50                      |             | .037    |
| Attends school                                         |                         | 195 (62.1%) |                         | 34 (68%)    |         |
| Full-time care (≥7h per day)                           |                         | 76 (24.2%)  |                         | 4 (8%)      |         |
| Part-time care (<7h per day)                           |                         | 30 (9.6%)   |                         | 8 (16%)     |         |
| None of the above                                      |                         | 13 (4.1%)   |                         | 4 (8%)      |         |

<sup>1</sup>Pervasive developmental disorder unspecified. <sup>2</sup>Kaufman Assessment Battery for Children. <sup>3</sup>IQ was assessed with standardized scales. If the child was unable to complete a standardized test, no quantitative IQ assessment was made, but only a categorical clinical judgment whether mental retardation (i.e. IQ<70) was present.

*Measures:* ADOS – Autism Diagnostic Observation Schedule. Higher scores indicate greater severity. Possible range: Total 0-37; Social Affect 0-27; Language and Communication 0-9; Reciprocal Social Interaction 0-19; Restricted and Repetitive Behavior 0-10.

SRS – Social Responsiveness Scale. Higher scores indicate greater severity. Possible range: Total 0-195; Social Awareness 0-24; Social Cognition 0-36; Social Communication 0-66; Social Motivation 0-33; Autistic Mannerisms 0-36.

Quality of life, participant and family: Visual analog scale. Higher scores indicate better quality of life. Possible range: 0-100, where 0 indicates worst possible and 100 best possible quality of life.

IQ – Intelligence Quotient. Higher scores indicate greater cognitive ability. Scores around 100 indicate normal intelligence; scores below 70 indicate mental retardation.

ADI-R – Autism Diagnostic Interview-Revised. Higher scores indicate greater severity. Possible range: Reciprocal Social Interaction 0-30; Language and Communication 0-26; Repetitive Behaviors and Interests 0-12; Early Onset 0-5.

**eFigure 1. Multidimensional Scaling of Baseline Characteristics by Treatment Group**

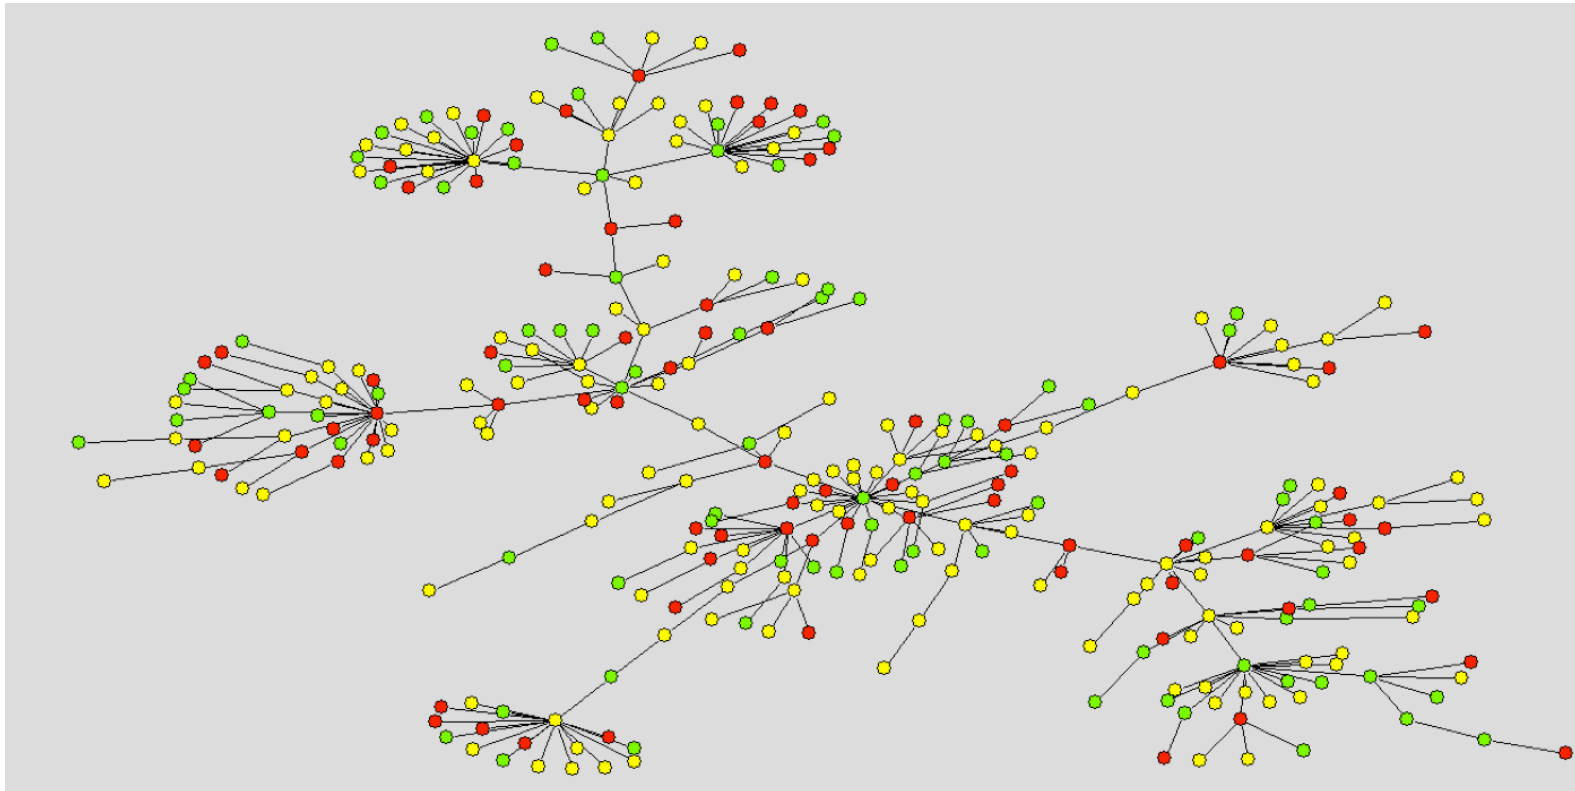

*Note.* This figure shows the clustering of records according to their multidimensional similarity. Yellow – enhanced standard care; red – high-intensity music therapy; green – low-intensity music therapy.

*Explanation:* The map in this figure represents the natural clustering of participants enrolled in the study obtained with minimum spanning tree algorithm. Each participant is described by 24 baseline variables (demographic characteristics and concomitant treatments). The figure shows the projection of all patients in a multidimensional space related to these variables. Natural clustering emerges bottom-up. Each node represents a participant. Participants are linked directly when their multidimensional similarity is very high. The closeness between participants is inversely proportional to separation degrees of the representing nodes.

*Interpretation:* In each cluster of participants the three groups are represented, suggesting that randomization created a multidimensional balance between the groups.



**eTable 3. Concomitant Treatments Provided as Part of Enhanced Standard Care**

| <b>Intervention</b>                                                         | <b>Baseline</b> | <b>2 months</b> | <b>5 months</b> | <b>12 months</b> |
|-----------------------------------------------------------------------------|-----------------|-----------------|-----------------|------------------|
|                                                                             | <b>n (%)</b>    | <b>n (%)</b>    | <b>n (%)</b>    | <b>n (%)</b>     |
| Specialist autism services tutoring of parents or school or day care centre | 123 (34%)       | 99 (36%)        | 100 (32%)       | 90 (30%)         |
| Sensory-motor therapy (incl. occupational & physiotherapy)                  | 151 (41%)       | 112 (41%)       | 109 (34%)       | 104 (35%)        |
| Speech and language therapy and communication training                      | 210 (58%)       | 150 (55%)       | 163 (52%)       | 155 (52%)        |
| Play therapy or Floortime approach                                          | 35 (10%)        | 24 (9%)         | 28 (9%)         | 18 (6%)          |
| Behavioral/educational intervention (e.g. TEACCH or ABA)                    | 55 (15%)        | 38 (14%)        | 45 (14%)        | 48 (16%)         |
| Social skills training                                                      | 31 (9%)         | 36 (13%)        | 43 (14%)        | 46 (15%)         |
| Therapeutic leisure activities (e.g. horse riding)                          | 47 (13%)        | 50 (18%)        | 55 (17%)        | 49 (16%)         |
| Other interventions                                                         | 60 (16%)        | 58 (21%)        | 63 (20%)        | 67 (23%)         |
| No specific therapy or intervention (outside of this study)                 | 55 (15%)        | 38 (14%)        | 45 (14%)        | 37 (12%)         |
| Institutional stay                                                          | 12 (3%)         | 9 (3%)          | 9 (3%)          | 8 (3%)           |
| Outpatient treatment                                                        | 38 (10%)        | 23 (8%)         | 19 (6%)         | 25 (8%)          |
| Supplement or medication                                                    | 110 (30%)       | 74 (27%)        | 74 (23%)        | 75 (25%)         |
| Special diet                                                                | 61 (17%)        | 32 (12%)        | 32 (10%)        | 31 (10%)         |

*Note.* n = 364 (baseline), 272 (2 months), 316 (5 months), 297 (12 months). At each time point, parents were asked to report interventions received during past two months.

*Abbreviations:* ABA – Applied Behavior Analysis; DIR – Developmental, Individual-differences, & Relationship-based Model; TEACCH – Treatment and Education of Autistic and Communication Handicapped Children.

**eTable 4. Mean Scores of Improvisational Music Therapy and Parent Counselling Principles**

**a) Parent counseling**

| <b>Parent counselling principle</b>                             | <b>Mean (SD)</b> | <b>Much or very much used, number of sessions (%)</b> |
|-----------------------------------------------------------------|------------------|-------------------------------------------------------|
| Creating a safe place                                           | 2.97 (0.17)      | 33 (100%)                                             |
| Discussing concerns regarding the present time                  | 2.76 (0.44)      | 33 (100%)                                             |
| Discussing concerns regarding the child's developmental process | 2.52 (0.62)      | 31 (94%)                                              |
| Providing information on various aspects of ASD                 | 1.30 (0.77)      | 10 (30%)                                              |
| Providing information on social communication and ASD           | 1.76 (0.71)      | 22 (67%)                                              |

*Note.* Based on 33 parent counseling sessions, one rater per session. Scores for each item were 0 (not used at all), 1 (a little), 2 (much), or 3 (used very much). All 33 sessions (100%) were rated as adequate overall.  
*Abbreviations:* ASD – Autism Spectrum Disorder.

**b) Improvisational music therapy**

| <b>Improvisational music therapy principle</b>         | <b>Mean (SD)</b> | <b>Frequently used, number of sessions (%)</b> |
|--------------------------------------------------------|------------------|------------------------------------------------|
| Facilitate musical and emotional attunement            | 3.45 (0.74)      | 495 (82%)                                      |
| Scaffold flow of interaction musically                 | 3.16 (0.79)      | 426 (70%)                                      |
| Tap into shared history of musical interaction         | 2.98 (0.93)      | 363 (60%)                                      |
| Build and maintain a positive therapeutic relationship | 3.67 (0.78)      | 529 (87%)                                      |
| Provide a secure environment                           | 3.7 (0.71)       | 548 (91%)                                      |
| Follow the child's lead                                | 3.08 (0.87)      | 408 (67%)                                      |
| Set treatment goals and evaluate progress              | 3.24 (0.76)      | 454 (75%)                                      |
| Facilitate enjoyment                                   | 2.97 (0.92)      | 372 (61%)                                      |

*Note.* Based on 606 randomly selected therapy sessions, average of two independent raters. Scores could range from 0 (not used at all) to 5 (used frequently and with mastery); scores  $\geq 3$  represented frequently used. Detailed definitions of principles, see ref. 15 in the main article. The mean sum score was 26.26 (SD 5.67); a total of 410 sessions (68%) had scores  $\geq 24$ . This cutoff was derived theoretically (i.e. 8 items with an average of  $\geq 3$ ), but was also justified by the ROC curve (see eFigure 3). Raters also provided a binary rating of whether the session was adequate overall: rater 1, 604/606 (100%) yes; rater 2, 566/606 yes (94%).

**eFigure 2. Patterns of Improvisational Music Therapy Sessions Received Per Week**

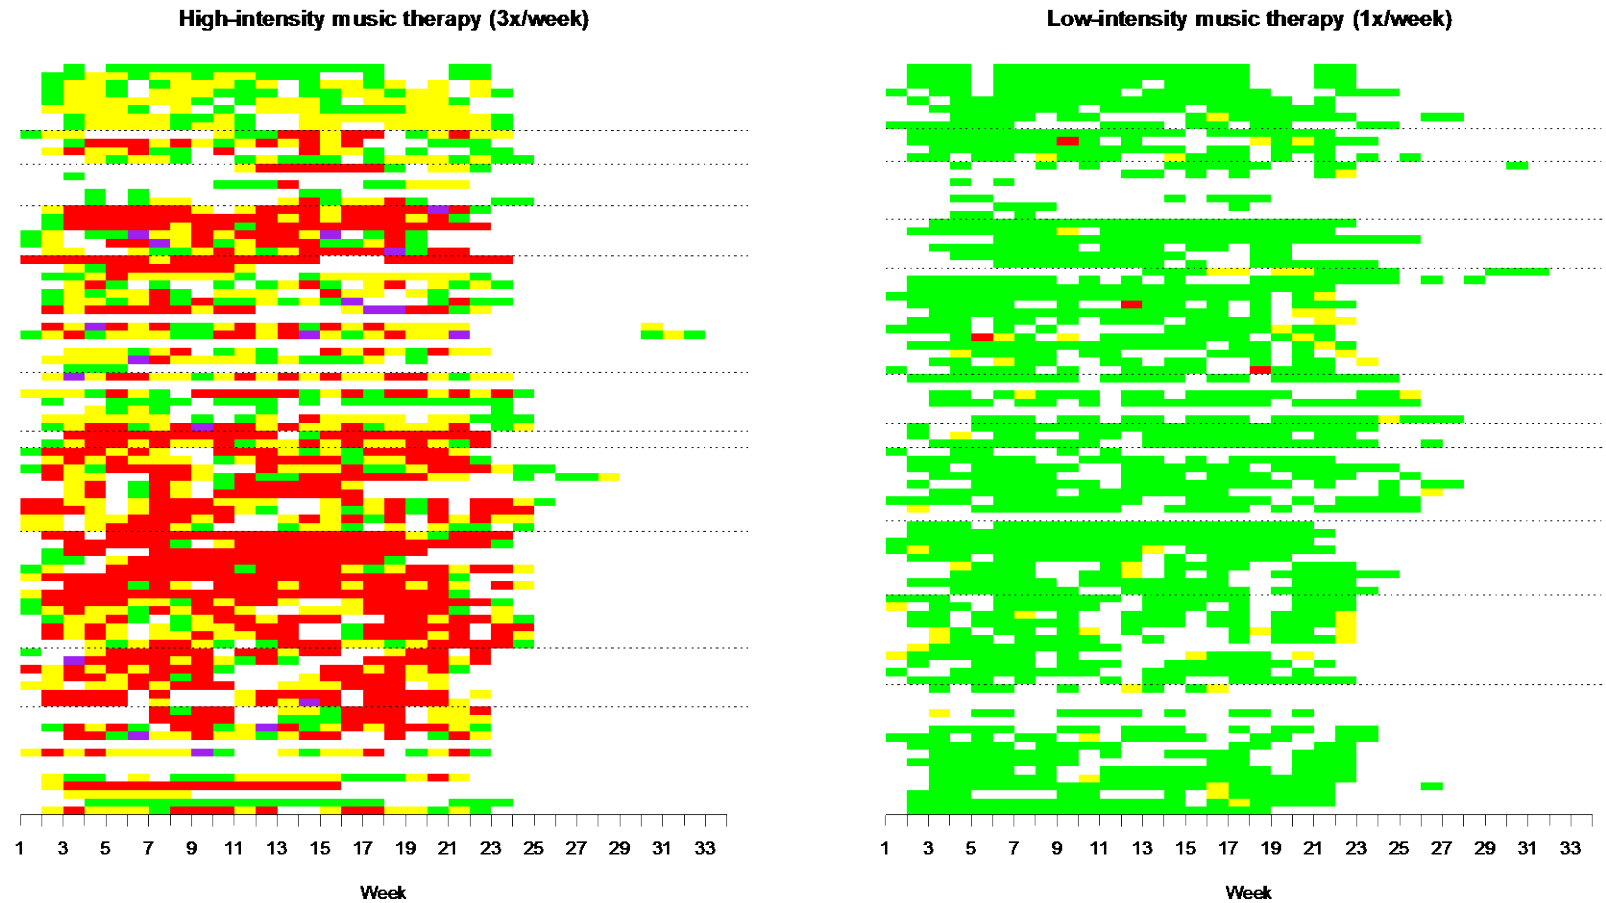

*Note.* Figure depicts number of sessions conducted with each participant per seven-day period (purple = 4, red = 3, yellow = 2, green = 1, white = 0). Each line represents one participant; sites are separated by dotted lines. It can be seen that patterns of missingness are irregular, suggesting holidays or illness as plausible causes rather than declining attendance over time.

Abbreviations: IMT – Improvisational music therapy.

**eFigure 3. ROC Curve for Optimal Treatment Fidelity Cutoffs**

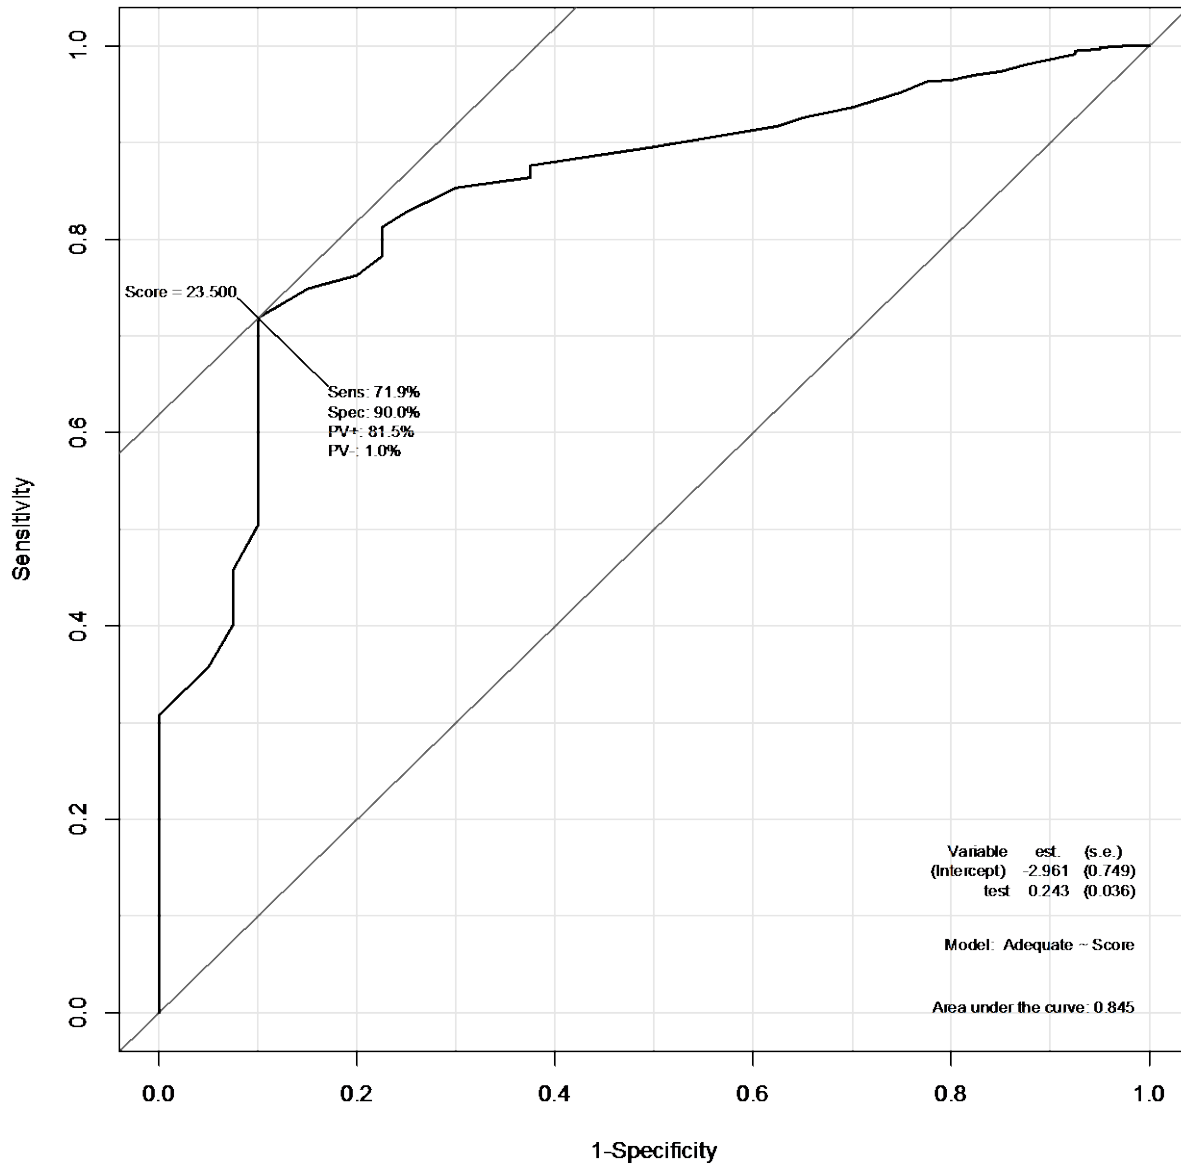

*Note.* This figure shows an ROC curve for predicting the dichotomous status (both raters agree in their overall judgment that the improvisational music therapy session was conducted adequately) from the continuous score (the mean of two raters' sum score of ratings of improvisational music therapy principles). The cutoff that maximized specificity and sensitivity was  $\geq 24$  versus  $<24$ .

*Abbreviations:* PV- – negative predictive value; PV+ – positive predictive value; ROC – received operating characteristic; Sens – sensitivity; Spec – specificity;

*Variables:* Adequate – overall rating of adequacy (1 if judged as adequate by two independent raters; 0 if judged as inadequate or uncertain by at least one of two raters); Score – sum score of 8 improvisational music therapy principles (see eTable 4b).

**eTable 5. Linear Mixed-Effects Analyses—All Outcomes, Two Groups**

| <b>ADOS Social Affect (Primary outcome)</b>                               | <b>Unadjusted</b>       |                 |                | <b>Adjusted for site</b> |                 |                |
|---------------------------------------------------------------------------|-------------------------|-----------------|----------------|--------------------------|-----------------|----------------|
|                                                                           | <b>Beta coefficient</b> | <b>CI</b>       | <b>P-value</b> | <b>Beta coefficient</b>  | <b>CI</b>       | <b>P-value</b> |
| Intercept                                                                 | 13.49                   | (12.82, 14.16)  | <0.001         | 13.67                    | (12.53, 14.81)  | <0.001         |
| Group (improvisational music therapy)                                     | 0.59                    | (-0.37, 1.54)   | 0.23           | 0.45                     | (-0.45, 1.36)   | 0.32           |
| 2 months vs. BL                                                           | -0.38                   | (-0.96, 0.21)   | 0.21           | -0.33                    | (-0.91, 0.25)   | 0.27           |
| 5 months vs. BL                                                           | -0.91                   | (-1.45, -0.36)  | 0.001          | -0.9                     | (-1.45, -0.36)  | 0.001          |
| 12 months vs. BL                                                          | -1.63                   | (-2.2, -1.07)   | <0.001         | -1.62                    | (-2.19, -1.06)  | <0.001         |
| Group * (2 months vs. BL)                                                 | 0.21                    | (-0.59, 1.01)   | 0.61           | 0.18                     | (-0.62, 0.98)   | 0.66           |
| Group * (5 months vs. BL)                                                 | 0.06                    | (-0.7, 0.81)    | 0.88           | 0.05                     | (-0.71, 0.81)   | 0.90           |
| Group * (12 months vs. BL)                                                | 0.16                    | (-0.62, 0.94)   | 0.69           | 0.14                     | (-0.64, 0.92)   | 0.73           |
|                                                                           |                         |                 |                |                          |                 |                |
| <b>Social Responsiveness (SRS) Total (Prespecified secondary outcome)</b> | <b>Beta coefficient</b> | <b>CI</b>       | <b>P-value</b> | <b>Beta coefficient</b>  | <b>CI</b>       | <b>P-value</b> |
| Intercept                                                                 | 95.81                   | (91.58, 100.04) | <0.001         | 95.62                    | (88.73, 102.52) | <0.001         |
| Group (improvisational music therapy)                                     | 0.05                    | (-5.94, 6.03)   | 0.99           | -0.37                    | (-5.99, 5.26)   | 0.90           |
| 2 months vs. BL                                                           | 0.47                    | (-2.67, 3.61)   | 0.77           | 0.81                     | (-2.33, 3.95)   | 0.61           |
| 5 months vs. BL                                                           | -1.81                   | (-4.87, 1.26)   | 0.25           | -1.53                    | (-4.59, 1.53)   | 0.33           |
| 12 months vs. BL                                                          | -4.61                   | (-7.7, -1.52)   | 0.004          | -4.35                    | (-7.44, -1.26)  | 0.006          |
| Group * (2 months vs. BL)                                                 | -2.37                   | (-6.7, 1.95)    | 0.28           | -2.65                    | (-6.97, 1.66)   | 0.23           |
| Group * (5 months vs. BL)                                                 | -3.32                   | (-7.56, 0.91)   | 0.13           | -3.57                    | (-7.8, 0.66)    | 0.10           |
| Group * (12 months vs. BL)                                                | -2.47                   | (-6.77, 1.84)   | 0.26           | -2.67                    | (-6.97, 1.64)   | 0.23           |

**eTable 5. Linear Mixed-Effects Analyses—All Outcomes, Two Groups (Continued)**

|                                                                  | Unadjusted              |                |                | Adjusted for site       |                |                |
|------------------------------------------------------------------|-------------------------|----------------|----------------|-------------------------|----------------|----------------|
| <b>SRS Social Awareness<br/>(Prespecified secondary outcome)</b> | <b>Beta coefficient</b> | <b>CI</b>      | <b>P-value</b> | <b>Beta coefficient</b> | <b>CI</b>      | <b>P-value</b> |
| Intercept                                                        | 12.39                   | (11.8, 12.99)  | <0.001         | 12.42                   | (11.42, 13.43) | <0.001         |
| Group (improvisational music therapy)                            | -0.3                    | (-1.14, 0.55)  | 0.49           | -0.38                   | (-1.17, 0.41)  | 0.34           |
| 2 months vs. BL                                                  | 0.43                    | (-0.1, 0.96)   | 0.11           | 0.51                    | (-0.01, 1.04)  | 0.06           |
| 5 months vs. BL                                                  | -0.16                   | (-0.67, 0.35)  | 0.53           | -0.1                    | (-0.61, 0.41)  | 0.70           |
| 12 months vs. BL                                                 | -0.57                   | (-1.08, -0.05) | 0.03           | -0.51                   | (-1.02, 0.01)  | 0.05           |
| Group * (2 months vs. BL)                                        | -0.58                   | (-1.3, 0.14)   | 0.12           | -0.64                   | (-1.36, 0.08)  | 0.08           |
| Group * (5 months vs. BL)                                        | -0.18                   | (-0.89, 0.52)  | 0.61           | -0.23                   | (-0.94, 0.47)  | 0.52           |
| Group * (12 months vs. BL)                                       | 0.13                    | (-0.58, 0.85)  | 0.72           | 0.1                     | (-0.62, 0.81)  | 0.79           |
|                                                                  |                         |                |                |                         |                |                |
| <b>SRS Social Cognition<br/>(Prespecified secondary outcome)</b> | <b>Beta coefficient</b> | <b>CI</b>      | <b>P-value</b> | <b>Beta coefficient</b> | <b>CI</b>      | <b>P-value</b> |
| Intercept                                                        | 18.65                   | (17.78, 19.53) | <0.001         | 18.56                   | (17.3, 19.82)  | <0.001         |
| Group (improvisational music therapy)                            | -0.48                   | (-1.73, 0.76)  | 0.45           | -0.53                   | (-1.73, 0.67)  | 0.39           |
| 2 months vs. BL                                                  | -0.33                   | (-1.1, 0.44)   | 0.40           | -0.25                   | (-1.02, 0.52)  | 0.52           |
| 5 months vs. BL                                                  | -0.45                   | (-1.19, 0.3)   | 0.24           | -0.39                   | (-1.14, 0.35)  | 0.30           |
| 12 months vs. BL                                                 | -1.25                   | (-2, -0.5)     | 0.001          | -1.2                    | (-1.95, -0.45) | 0.002          |
| Group * (2 months vs. BL)                                        | 0.4                     | (-0.66, 1.45)  | 0.46           | 0.34                    | (-0.71, 1.4)   | 0.52           |
| Group * (5 months vs. BL)                                        | -0.38                   | (-1.41, 0.65)  | 0.47           | -0.42                   | (-1.45, 0.61)  | 0.42           |
| Group * (12 months vs. BL)                                       | 0.11                    | (-0.94, 1.16)  | 0.84           | 0.07                    | (-0.97, 1.12)  | 0.89           |

**eTable 5. Linear Mixed-Effects Analyses—All Outcomes, Two Groups (Continued)**

|                                                                      | Unadjusted       |                |         | Adjusted for site |                |         |
|----------------------------------------------------------------------|------------------|----------------|---------|-------------------|----------------|---------|
|                                                                      | Beta coefficient | CI             | P-value | Beta coefficient  | CI             | P-value |
| <b>SRS Social Communication<br/>(Prespecified secondary outcome)</b> |                  |                |         |                   |                |         |
| Intercept                                                            | 32.06            | (30.55, 33.57) | <0.001  | 31.91             | (29.79, 34.04) | <0.001  |
| Group (improvisational music therapy)                                | 0.06             | (-2.08, 2.2)   | 0.96    | -0.03             | (-2.1, 2.04)   | 0.98    |
| 2 months vs. BL                                                      | -0.15            | (-1.45, 1.16)  | 0.82    | -0.02             | (-1.32, 1.29)  | 0.98    |
| 5 months vs. BL                                                      | -1.13            | (-2.4, 0.13)   | 0.08    | -1.04             | (-2.3, 0.23)   | 0.11    |
| 12 months vs. BL                                                     | -2.09            | (-3.37, -0.82) | 0.001   | -2                | (-3.28, -0.73) | 0.002   |
| Group * (2 months vs. BL)                                            | -0.48            | (-2.27, 1.32)  | 0.60    | -0.58             | (-2.37, 1.21)  | 0.53    |
| Group * (5 months vs. BL)                                            | -1.19            | (-2.95, 0.56)  | 0.18    | -1.28             | (-3.03, 0.47)  | 0.15    |
| Group * (12 months vs. BL)                                           | -0.38            | (-2.16, 1.4)   | 0.68    | -0.46             | (-2.24, 1.32)  | 0.62    |
|                                                                      |                  |                |         |                   |                |         |
| <b>SRS Social Motivation<br/>(Prespecified secondary outcome)</b>    |                  |                |         |                   |                |         |
| Intercept                                                            | 15.01            | (14.18, 15.83) | <0.001  | 15.03             | (13.78, 16.28) | <0.001  |
| Group (improvisational music therapy)                                | -0.19            | (-1.36, 0.98)  | 0.75    | -0.28             | (-1.39, 0.84)  | 0.63    |
| 2 months vs. BL                                                      | -0.21            | (-0.94, 0.53)  | 0.58    | -0.14             | (-0.87, 0.6)   | 0.72    |
| 5 months vs. BL                                                      | -0.59            | (-1.31, 0.12)  | 0.10    | -0.55             | (-1.26, 0.17)  | 0.13    |
| 12 months vs. BL                                                     | -1.04            | (-1.75, -0.32) | 0.005   | -0.99             | (-1.71, -0.28) | 0.007   |
| Group * (2 months vs. BL)                                            | -0.36            | (-1.37, 0.64)  | 0.48    | -0.41             | (-1.42, 0.6)   | 0.43    |
| Group * (5 months vs. BL)                                            | -0.95            | (-1.94, 0.03)  | 0.06    | -0.99             | (-1.97, -0.01) | 0.05    |
| Group * (12 months vs. BL)                                           | -0.78            | (-1.78, 0.22)  | 0.13    | -0.81             | (-1.81, 0.19)  | 0.12    |

**eTable 5. Linear Mixed-Effects Analyses—All Outcomes, Two Groups (Continued)**

| <b>SRS Autistic Mannerisms<br/>(Prespecified secondary outcome)</b> | <b>Unadjusted</b>       |                |                | <b>Adjusted for site</b> |                |                |
|---------------------------------------------------------------------|-------------------------|----------------|----------------|--------------------------|----------------|----------------|
|                                                                     | <b>Beta coefficient</b> | <b>CI</b>      | <b>P-value</b> | <b>Beta coefficient</b>  | <b>CI</b>      | <b>P-value</b> |
| Intercept                                                           | 17.57                   | (16.53, 18.6)  | <0.001         | 17.63                    | (15.98, 19.28) | <0.001         |
| Group (improvisational music therapy)                               | 0.85                    | (-0.62, 2.32)  | 0.26           | 0.78                     | (-0.61, 2.18)  | 0.27           |
| 2 months vs. BL                                                     | 0.38                    | (-0.48, 1.25)  | 0.39           | 0.47                     | (-0.39, 1.34)  | 0.28           |
| 5 months vs. BL                                                     | 0.13                    | (-0.71, 0.97)  | 0.76           | 0.2                      | (-0.64, 1.04)  | 0.64           |
| 12 months vs. BL                                                    | -0.19                   | (-1.03, 0.66)  | 0.66           | -0.12                    | (-0.96, 0.72)  | 0.78           |
| Group * (2 months vs. BL)                                           | -1.12                   | (-2.3, 0.07)   | 0.07           | -1.2                     | (-2.39, -0.02) | 0.05           |
| Group * (5 months vs. BL)                                           | -1.05                   | (-2.21, 0.1)   | 0.08           | -1.13                    | (-2.29, 0.03)  | 0.06           |
| Group * (12 months vs. BL)                                          | -1.13                   | (-2.31, 0.05)  | 0.06           | -1.19                    | (-2.37, -0.01) | 0.05           |
|                                                                     |                         |                |                |                          |                |                |
| <b>ADOS Total (Post hoc outcome)</b>                                | <b>Beta coefficient</b> | <b>CI</b>      | <b>P-value</b> | <b>Beta coefficient</b>  | <b>CI</b>      | <b>P-value</b> |
| Intercept                                                           | 17.37                   | (16.56, 18.19) | <0.001         | 17.43                    | (16.26, 18.59) | <0.001         |
| Group (improvisational music therapy)                               | 0.65                    | (-0.51, 1.8)   | 0.27           | 0.54                     | (-0.58, 1.66)  | 0.34           |
| 2 months vs. BL                                                     | -0.45                   | (-1.11, 0.21)  | 0.19           | -0.4                     | (-1.06, 0.26)  | 0.24           |
| 5 months vs. BL                                                     | -1.08                   | (-1.7, -0.46)  | <0.001         | -1.07                    | (-1.69, -0.45) | <0.001         |
| 12 months vs. BL                                                    | -2.03                   | (-2.67, -1.39) | <0.001         | -2.01                    | (-2.65, -1.37) | <0.001         |
| Group * (2 months vs. BL)                                           | 0.24                    | (-0.67, 1.14)  | 0.61           | 0.21                     | (-0.7, 1.11)   | 0.65           |
| Group * (5 months vs. BL)                                           | 0.11                    | (-0.75, 0.97)  | 0.81           | 0.1                      | (-0.76, 0.95)  | 0.83           |
| Group * (12 months vs. BL)                                          | 0.33                    | (-0.55, 1.22)  | 0.46           | 0.31                     | (-0.57, 1.2)   | 0.49           |



**eTable 5. Linear Mixed-Effects Analyses—All Outcomes, Two Groups (Continued)**

| ADOS Language and Communication<br>(Post hoc outcome)            | Unadjusted       |                |         | Adjusted for site |                |         |
|------------------------------------------------------------------|------------------|----------------|---------|-------------------|----------------|---------|
|                                                                  | Beta coefficient | CI             | P-value | Beta coefficient  | CI             | P-value |
| Intercept                                                        | 3.25             | (3.03, 3.48)   | <0.001  | 3.31              | (2.84, 3.78)   | <0.001  |
| Group (improvisational music therapy)                            | 0.1              | (-0.22, 0.43)  | 0.52    | 0.05              | (-0.24, 0.33)  | 0.75    |
| 2 months vs. BL                                                  | -0.27            | (-0.5, -0.04)  | 0.02    | -0.23             | (-0.46, -0.01) | 0.04    |
| 5 months vs. BL                                                  | -0.4             | (-0.62, -0.19) | <0.001  | -0.39             | (-0.6, -0.17)  | <0.001  |
| 12 months vs. BL                                                 | -0.54            | (-0.76, -0.32) | <0.001  | -0.52             | (-0.74, -0.3)  | <0.001  |
| Group * (2 months vs. BL)                                        | 0.18             | (-0.13, 0.49)  | 0.26    | 0.15              | (-0.16, 0.46)  | 0.35    |
| Group * (5 months vs. BL)                                        | 0.13             | (-0.17, 0.42)  | 0.41    | 0.11              | (-0.19, 0.4)   | 0.49    |
| Group * (12 months vs. BL)                                       | 0.16             | (-0.14, 0.47)  | 0.30    | 0.13              | (-0.17, 0.44)  | 0.39    |
| <b>ADOS Reciprocal Social Interaction<br/>(Post hoc outcome)</b> |                  |                |         |                   |                |         |
| Intercept                                                        | 10.24            | (9.7, 10.78)   | <0.001  | 10.34             | (9.58, 11.1)   | <0.001  |
| Group (improvisational music therapy)                            | 0.48             | (-0.28, 1.25)  | 0.22    | 0.41              | (-0.33, 1.16)  | 0.28    |
| 2 months vs. BL                                                  | -0.12            | (-0.6, 0.37)   | 0.64    | -0.09             | (-0.57, 0.39)  | 0.71    |
| 5 months vs. BL                                                  | -0.5             | (-0.96, -0.05) | 0.03    | -0.5              | (-0.96, -0.05) | 0.03    |
| 12 months vs. BL                                                 | -1.09            | (-1.56, -0.63) | <0.001  | -1.09             | (-1.56, -0.62) | <0.001  |
| Group * (2 months vs. BL)                                        | 0.04             | (-0.62, 0.7)   | 0.90    | 0.03              | (-0.63, 0.69)  | 0.94    |
| Group * (5 months vs. BL)                                        | -0.06            | (-0.69, 0.56)  | 0.84    | -0.07             | (-0.69, 0.56)  | 0.84    |
| Group * (12 months vs. BL)                                       | -0.01            | (-0.66, 0.64)  | 0.98    | -0.02             | (-0.66, 0.63)  | 0.96    |

**eTable 5. Linear Mixed-Effects Analyses—All Outcomes, Two Groups (Continued)**

|                                                                   | Unadjusted       |               |         | Adjusted for site |                |         |
|-------------------------------------------------------------------|------------------|---------------|---------|-------------------|----------------|---------|
|                                                                   | Beta coefficient | CI            | P-value | Beta coefficient  | CI             | P-value |
| <b>ADOS Restricted and Repetitive Behavior (Post hoc outcome)</b> |                  |               |         |                   |                |         |
| Intercept                                                         | 3.91             | (3.62, 4.2)   | <0.001  | 3.77              | (3.26, 4.29)   | <0.001  |
| Group (improvisational music therapy)                             | 0.03             | (-0.38, 0.44) | 0.87    | 0.06              | (-0.33, 0.45)  | 0.76    |
| 2 months vs. BL                                                   | -0.11            | (-0.4, 0.18)  | 0.47    | -0.09             | (-0.38, 0.2)   | 0.56    |
| 5 months vs. BL                                                   | -0.21            | (-0.48, 0.07) | 0.14    | -0.2              | (-0.48, 0.07)  | 0.15    |
| 12 months vs. BL                                                  | -0.48            | (-0.76, -0.2) | <0.001  | -0.47             | (-0.75, -0.18) | 0.001   |
| Group * (2 months vs. BL)                                         | 0.06             | (-0.34, 0.46) | 0.78    | 0.05              | (-0.35, 0.45)  | 0.80    |
| Group * (5 months vs. BL)                                         | 0.08             | (-0.3, 0.46)  | 0.67    | 0.08              | (-0.3, 0.46)   | 0.68    |
| Group * (12 months vs. BL)                                        | 0.26             | (-0.13, 0.65) | 0.19    | 0.25              | (-0.14, 0.64)  | 0.20    |
| <b>Quality of life, participant (Post hoc outcome)</b>            |                  |               |         |                   |                |         |
| Intercept                                                         | 71.13            | (68.66, 73.6) | <0.001  | 71.01             | (68.01, 74.01) | <0.001  |
| Group (improvisational music therapy)                             | 1.19             | (-2.32, 4.7)  | 0.51    | 1.13              | (-2.33, 4.58)  | 0.52    |
| 2 months vs. BL                                                   | 1.83             | (-0.56, 4.21) | 0.13    | 1.76              | (-0.63, 4.15)  | 0.15    |
| 5 months vs. BL                                                   | 3.4              | (1.11, 5.68)  | 0.004   | 3.39              | (1.11, 5.68)   | 0.004   |
| 12 months vs. BL                                                  | 4.9              | (2.6, 7.21)   | <0.001  | 4.91              | (2.6, 7.22)    | <0.001  |
| Group * (2 months vs. BL)                                         | -0.35            | (-3.67, 2.97) | 0.84    | -0.33             | (-3.65, 2.99)  | 0.85    |
| Group * (5 months vs. BL)                                         | 2.73             | (-0.49, 5.94) | 0.10    | 2.71              | (-0.5, 5.93)   | 0.10    |
| Group * (12 months vs. BL)                                        | 0.4              | (-2.87, 3.66) | 0.81    | 0.36              | (-2.9, 3.62)   | 0.83    |

**eTable 5. Linear Mixed-Effects Analyses—All Outcomes, Two Groups (Continued)**

| Quality of life, family<br>(Post hoc outcome) | Unadjusted       |                |         | Adjusted for site |                |         |
|-----------------------------------------------|------------------|----------------|---------|-------------------|----------------|---------|
|                                               | Beta coefficient | CI             | P-value | Beta coefficient  | CI             | P-value |
| Intercept                                     | 68.02            | (65.25, 70.79) | <0.001  | 68                | (64.53, 71.48) | <0.001  |
| Group (improvisational music therapy)         | 0.39             | (-3.55, 4.33)  | 0.84    | 0.31              | (-3.58, 4.2)   | 0.88    |
| 2 months vs. BL                               | 2.01             | (-0.51, 4.52)  | 0.12    | 2.02              | (-0.5, 4.54)   | 0.12    |
| 5 months vs. BL                               | 2.77             | (0.35, 5.19)   | 0.03    | 2.79              | (0.37, 5.21)   | 0.02    |
| 12 months vs. BL                              | 3.55             | (1.1, 5.99)    | 0.005   | 3.56              | (1.11, 6.01)   | 0.005   |
| Group * (2 months vs. BL)                     | -1.16            | (-4.66, 2.35)  | 0.52    | -1.13             | (-4.64, 2.37)  | 0.53    |
| Group * (5 months vs. BL)                     | 0.88             | (-2.51, 4.27)  | 0.61    | 0.9               | (-2.48, 4.29)  | 0.60    |
| Group * (12 months vs. BL)                    | -0.15            | (-3.6, 3.31)   | 0.93    | -0.15             | (-3.6, 3.31)   | 0.93    |

*Abbreviations:* BL – Baseline.

*Measures:* ADOS – Autism Diagnostic Observation Schedule. Higher scores indicate greater severity. Possible range: Total 0-37; Social Affect 0-27; Language and Communication 0-9; Reciprocal Social Interaction 0-19; Restricted and Repetitive Behavior 0-10.

SRS – Social Responsiveness Scale. Higher scores indicate greater severity. Possible range: Total 0-195; Social Awareness 0-24; Social Cognition 0-36; Social Communication 0-66; Social Motivation 0-33; Autistic Mannerisms 0-36.

Quality of life, participant and family: Visual analog scale. Higher scores indicate better quality of life. Possible range: 0-100, where 0 indicates worst possible and 100 best possible quality of life.

*Explanation of the model:* Intercept – mean value in enhanced standard care at baseline. Group (Music therapy) – difference from Intercept if in music therapy. 2/5/12 months vs. BL – difference from baseline in enhanced standard care at 2, 5 or 12 months. Group \* (2 months vs. BL) – interaction effect, representing the difference between Music therapy and enhanced standard care change from baseline at 2 months (i.e. the treatment effect); similar for 5 and 12 months. The beta coefficients can be added to predict values for each group and time point. For example, the value of the primary outcome in music therapy at 5 months is  $13.49+0.59+(-0.91)+0.06=13.23$ .

**eTable 6. Linear Mixed-Effects Analyses—All Outcomes, Three Groups**

| ADOS Social Affect (Primary outcome)                       | Unadjusted       |                |         | Adjusted for site |                |         |
|------------------------------------------------------------|------------------|----------------|---------|-------------------|----------------|---------|
|                                                            | Beta coefficient | CI             | P-value | Beta coefficient  | CI             | P-value |
| Intercept                                                  | 13.49            | (12.82, 14.16) | <0.001  | 13.68             | (12.53, 14.82) | <0.001  |
| High-intensity MT vs. standard care                        | 0.91             | (-0.26, 2.08)  | 0.13    | 0.86              | (-0.25, 1.96)  | 0.13    |
| Low-intensity MT vs. standard care                         | 0.27             | (-0.89, 1.43)  | 0.65    | 0.06              | (-1.04, 1.16)  | 0.92    |
| 2 months vs. BL                                            | -0.38            | (-0.96, 0.21)  | 0.21    | -0.33             | (-0.91, 0.25)  | 0.27    |
| 5 months vs. BL                                            | -0.91            | (-1.45, -0.36) | 0.001   | -0.9              | (-1.45, -0.36) | 0.001   |
| 12 months vs. BL                                           | -1.63            | (-2.2, -1.07)  | <0.001  | -1.62             | (-2.19, -1.06) | <0.001  |
| (High-intensity MT vs. standard care) * (2 months vs. BL)  | 0.21             | (-0.78, 1.2)   | 0.68    | 0.18              | (-0.8, 1.17)   | 0.72    |
| (Low-intensity MT vs. standard care) * (2 months vs. BL)   | 0.22             | (-0.73, 1.17)  | 0.65    | 0.19              | (-0.76, 1.14)  | 0.70    |
| (High-intensity MT vs. standard care) * (5 months vs. BL)  | -0.24            | (-1.18, 0.69)  | 0.61    | -0.26             | (-1.19, 0.68)  | 0.59    |
| (Low-intensity MT vs. standard care) * (5 months vs. BL)   | 0.34             | (-0.57, 1.24)  | 0.47    | 0.33              | (-0.57, 1.24)  | 0.48    |
| (High-intensity MT vs. standard care) * (12 months vs. BL) | 0.18             | (-0.78, 1.14)  | 0.72    | 0.16              | (-0.8, 1.12)   | 0.75    |
| (Low-intensity MT vs. standard care) * (12 months vs. BL)  | 0.15             | (-0.78, 1.08)  | 0.76    | 0.13              | (-0.8, 1.06)   | 0.78    |

**eTable 6. Linear Mixed-Effects Analyses—All Outcomes, Three Groups (Continued)**

| <b>Social Responsiveness (SRS) Total<br/>(Prespecified secondary outcome)</b> | <b>Unadjusted</b>           |                    |                     | <b>Adjusted for site</b>    |                    |                     |
|-------------------------------------------------------------------------------|-----------------------------|--------------------|---------------------|-----------------------------|--------------------|---------------------|
|                                                                               | <b>Beta<br/>coefficient</b> | <b>CI</b>          | <b>P-<br/>value</b> | <b>Beta<br/>coefficient</b> | <b>CI</b>          | <b>P-<br/>value</b> |
| Intercept                                                                     | 95.81                       | (91.58,<br>100.04) | <0.001              | 95.62                       | (88.73,<br>102.52) | <0.001              |
| High-intensity MT vs. standard care                                           | -0.27                       | (-7.62, 7.09)      | 0.94                | -0.63                       | (-7.53, 6.28)      | 0.86                |
| Low-intensity MT vs. standard care                                            | 0.35                        | (-6.95, 7.64)      | 0.93                | -0.11                       | (-6.98, 6.76)      | 0.97                |
| 2 months vs. BL                                                               | 0.47                        | (-2.67, 3.6)       | 0.77                | 0.81                        | (-2.32, 3.95)      | 0.61                |
| 5 months vs. BL                                                               | -1.81                       | (-4.86, 1.25)      | 0.25                | -1.53                       | (-4.59, 1.52)      | 0.33                |
| 12 months vs. BL                                                              | -4.61                       | (-7.69, -1.52)     | 0.004               | -4.35                       | (-7.43, -1.27)     | 0.006               |
| (High-intensity MT vs. standard care) * (2 months vs. BL)                     | -1.54                       | (-6.89, 3.81)      | 0.57                | -1.84                       | (-7.18, 3.5)       | 0.50                |
| (Low-intensity MT vs. standard care) * (2 months vs. BL)                      | -3.11                       | (-8.25, 2.03)      | 0.24                | -3.37                       | (-8.51, 1.77)      | 0.20                |
| (High-intensity MT vs. standard care) * (5 months vs. BL)                     | -4.52                       | (-9.81, 0.76)      | 0.10                | -4.79                       | (-10.07, 0.48)     | 0.08                |
| (Low-intensity MT vs. standard care) * (5 months vs. BL)                      | -2.39                       | (-7.41, 2.63)      | 0.35                | -2.61                       | (-7.63, 2.4)       | 0.31                |
| (High-intensity MT vs. standard care) * (12 months vs. BL)                    | -1.52                       | (-6.87, 3.84)      | 0.58                | -1.75                       | (-7.1, 3.6)        | 0.52                |
| (Low-intensity MT vs. standard care) * (12 months vs. BL)                     | -3.29                       | (-8.43, 1.85)      | 0.21                | -3.46                       | (-8.6, 1.67)       | 0.19                |

**eTable 6. Linear Mixed-Effects Analyses—All Outcomes, Three Groups (Continued)**

| <b>SRS Social Awareness<br/>(Prespecified secondary outcome)</b> | <b>Unadjusted</b>           |                    |                     | <b>Adjusted for site</b>    |                   |                     |
|------------------------------------------------------------------|-----------------------------|--------------------|---------------------|-----------------------------|-------------------|---------------------|
|                                                                  | <b>Beta<br/>coefficient</b> | <b>CI</b>          | <b>P-<br/>value</b> | <b>Beta<br/>coefficient</b> | <b>CI</b>         | <b>P-<br/>value</b> |
| Intercept                                                        | 12.39                       | (11.8,<br>12.99)   | <0.001              | 12.42                       | (11.42,<br>13.43) | <0.001              |
| High-intensity MT vs. standard care                              | -0.21                       | (-1.25, 0.82)      | 0.69                | -0.25                       | (-1.22, 0.72)     | 0.61                |
| Low-intensity MT vs. standard care                               | -0.38                       | (-1.41, 0.65)      | 0.47                | -0.51                       | (-1.48, 0.45)     | 0.30                |
| 2 months vs. BL                                                  | 0.43                        | (-0.09, 0.96)      | 0.11                | 0.51                        | (-0.01, 1.04)     | 0.06                |
| 5 months vs. BL                                                  | -0.16                       | (-0.67, 0.35)      | 0.53                | -0.1                        | (-0.61, 0.41)     | 0.70                |
| 12 months vs. BL                                                 | -0.57                       | (-1.08, -<br>0.05) | 0.03                | -0.51                       | (-1.02, 0)        | 0.05                |
| (High-intensity MT vs. standard care) * (2 months vs. BL)        | -0.29                       | (-1.18, 0.61)      | 0.53                | -0.35                       | (-1.24, 0.54)     | 0.44                |
| (Low-intensity MT vs. standard care) * (2 months vs. BL)         | -0.83                       | (-1.69, 0.03)      | 0.06                | -0.88                       | (-1.74, -0.03)    | 0.04                |
| (High-intensity MT vs. standard care) * (5 months vs. BL)        | -0.11                       | (-0.99, 0.77)      | 0.81                | -0.16                       | (-1.04, 0.72)     | 0.73                |
| (Low-intensity MT vs. standard care) * (5 months vs. BL)         | -0.24                       | (-1.08, 0.59)      | 0.57                | -0.29                       | (-1.12, 0.54)     | 0.49                |
| (High-intensity MT vs. standard care) * (12 months vs. BL)       | 0.01                        | (-0.88, 0.91)      | 0.98                | -0.03                       | (-0.91, 0.86)     | 0.96                |
| (Low-intensity MT vs. standard care) * (12 months vs. BL)        | 0.23                        | (-0.62, 1.09)      | 0.59                | 0.21                        | (-0.65, 1.06)     | 0.64                |

**eTable 6. Linear Mixed-Effects Analyses—All Outcomes, Three Groups (Continued)**

| <b>SRS Social Cognition<br/>(Prespecified secondary outcome)</b> | <b>Unadjusted</b>           |                   |                     | <b>Adjusted for site</b>    |                    |                     |
|------------------------------------------------------------------|-----------------------------|-------------------|---------------------|-----------------------------|--------------------|---------------------|
|                                                                  | <b>Beta<br/>coefficient</b> | <b>CI</b>         | <b>P-<br/>value</b> | <b>Beta<br/>coefficient</b> | <b>CI</b>          | <b>P-<br/>value</b> |
| Intercept                                                        | 18.65                       | (17.78,<br>19.53) | <0.001              | 18.56                       | (17.3,<br>19.82)   | <0.001              |
| High-intensity MT vs. standard care                              | -0.68                       | (-2.2, 0.85)      | 0.39                | -0.72                       | (-2.19, 0.76)      | 0.34                |
| Low-intensity MT vs. standard care                               | -0.3                        | (-1.81, 1.22)     | 0.70                | -0.34                       | (-1.81, 1.13)      | 0.65                |
| 2 months vs. BL                                                  | -0.33                       | (-1.09, 0.44)     | 0.40                | -0.25                       | (-1.02, 0.51)      | 0.52                |
| 5 months vs. BL                                                  | -0.45                       | (-1.19, 0.3)      | 0.24                | -0.39                       | (-1.14, 0.35)      | 0.30                |
| 12 months vs. BL                                                 | -1.25                       | (-2, -0.51)       | 0.001               | -1.2                        | (-1.95, -<br>0.45) | 0.002               |
| (High-intensity MT vs. standard care) * (2 months vs. BL)        | 0.86                        | (-0.45, 2.16)     | 0.20                | 0.81                        | (-0.5, 2.11)       | 0.23                |
| (Low-intensity MT vs. standard care) * (2 months vs. BL)         | -0.02                       | (-1.27, 1.24)     | 0.98                | -0.07                       | (-1.32, 1.19)      | 0.92                |
| (High-intensity MT vs. standard care) * (5 months vs. BL)        | -0.32                       | (-1.61, 0.97)     | 0.63                | -0.36                       | (-1.65, 0.92)      | 0.58                |
| (Low-intensity MT vs. standard care) * (5 months vs. BL)         | -0.45                       | (-1.67, 0.77)     | 0.47                | -0.49                       | (-1.71, 0.72)      | 0.43                |
| (High-intensity MT vs. standard care) * (12 months vs. BL)       | 0.53                        | (-0.78, 1.83)     | 0.43                | 0.48                        | (-0.82, 1.79)      | 0.47                |
| (Low-intensity MT vs. standard care) * (12 months vs. BL)        | -0.27                       | (-1.52, 0.98)     | 0.67                | -0.3                        | (-1.55, 0.96)      | 0.64                |

**eTable 6. Linear Mixed-Effects Analyses—All Outcomes, Three Groups (Continued)**

| SRS Social Communication<br>(Prespecified secondary outcome) | Unadjusted       |                |         | Adjusted for site |                |         |
|--------------------------------------------------------------|------------------|----------------|---------|-------------------|----------------|---------|
|                                                              | Beta coefficient | CI             | P-value | Beta coefficient  | CI             | P-value |
| Intercept                                                    | 32.06            | (30.55, 33.57) | <0.001  | 31.91             | (29.79, 34.04) | <0.001  |
| High-intensity MT vs. standard care                          | -0.18            | (-2.82, 2.45)  | 0.89    | -0.29             | (-2.83, 2.26)  | 0.83    |
| Low-intensity MT vs. standard care                           | 0.3              | (-2.32, 2.91)  | 0.82    | 0.22              | (-2.31, 2.75)  | 0.87    |
| 2 months vs. BL                                              | -0.15            | (-1.45, 1.15)  | 0.82    | -0.02             | (-1.32, 1.28)  | 0.98    |
| 5 months vs. BL                                              | -1.13            | (-2.4, 0.13)   | 0.08    | -1.04             | (-2.3, 0.22)   | 0.11    |
| 12 months vs. BL                                             | -2.09            | (-3.36, -0.82) | 0.001   | -2                | (-3.27, -0.73) | 0.002   |
| (High-intensity MT vs. standard care) * (2 months vs. BL)    | 0.4              | (-1.81, 2.62)  | 0.72    | 0.32              | (-1.9, 2.53)   | 0.78    |
| (Low-intensity MT vs. standard care) * (2 months vs. BL)     | -1.25            | (-3.38, 0.88)  | 0.25    | -1.37             | (-3.5, 0.76)   | 0.21    |
| (High-intensity MT vs. standard care) * (5 months vs. BL)    | -1.74            | (-3.93, 0.44)  | 0.12    | -1.82             | (-4, 0.37)     | 0.10    |
| (Low-intensity MT vs. standard care) * (5 months vs. BL)     | -0.78            | (-2.85, 1.29)  | 0.46    | -0.88             | (-2.95, 1.19)  | 0.41    |
| (High-intensity MT vs. standard care) * (12 months vs. BL)   | 0.01             | (-2.2, 2.23)   | 0.99    | -0.07             | (-2.28, 2.14)  | 0.95    |
| (Low-intensity MT vs. standard care) * (12 months vs. BL)    | -0.75            | (-2.88, 1.38)  | 0.49    | -0.82             | (-2.95, 1.31)  | 0.45    |



**eTable 6. Linear Mixed-Effects Analyses—All Outcomes, Three Groups (Continued)**

|                                                                   | Unadjusted       |                |         | Adjusted for site |                |         |
|-------------------------------------------------------------------|------------------|----------------|---------|-------------------|----------------|---------|
|                                                                   | Beta coefficient | CI             | P-value | Beta coefficient  | CI             | P-value |
| <b>SRS Social Motivation<br/>(Prespecified secondary outcome)</b> |                  |                |         |                   |                |         |
| Intercept                                                         | 15.01            | (14.18, 15.83) | <0.001  | 15.03             | (13.78, 16.28) | <0.001  |
| High-intensity MT vs. standard care                               | 0.03             | (-1.41, 1.46)  | 0.97    | -0.05             | (-1.42, 1.32)  | 0.94    |
| Low-intensity MT vs. standard care                                | -0.41            | (-1.83, 1.02)  | 0.58    | -0.5              | (-1.86, 0.87)  | 0.47    |
| 2 months vs. BL                                                   | -0.21            | (-0.94, 0.53)  | 0.58    | -0.14             | (-0.87, 0.6)   | 0.72    |
| 5 months vs. BL                                                   | -0.59            | (-1.3, 0.12)   | 0.10    | -0.55             | (-1.26, 0.17)  | 0.13    |
| 12 months vs. BL                                                  | -1.04            | (-1.75, -0.32) | 0.005   | -0.99             | (-1.71, -0.28) | 0.007   |
| (High-intensity MT vs. standard care) * (2 months vs. BL)         | -0.77            | (-2.02, 0.48)  | 0.23    | -0.81             | (-2.06, 0.43)  | 0.20    |
| (Low-intensity MT vs. standard care) * (2 months vs. BL)          | -0.01            | (-1.21, 1.19)  | 0.98    | -0.06             | (-1.26, 1.14)  | 0.92    |
| (High-intensity MT vs. standard care) * (5 months vs. BL)         | -0.98            | (-2.22, 0.25)  | 0.12    | -1.02             | (-2.25, 0.21)  | 0.11    |
| (Low-intensity MT vs. standard care) * (5 months vs. BL)          | -0.91            | (-2.08, 0.25)  | 0.13    | -0.95             | (-2.11, 0.22)  | 0.11    |
| (High-intensity MT vs. standard care) * (12 months vs. BL)        | -0.6             | (-1.84, 0.65)  | 0.35    | -0.63             | (-1.87, 0.62)  | 0.32    |
| (Low-intensity MT vs. standard care) * (12 months vs. BL)         | -0.93            | (-2.13, 0.27)  | 0.13    | -0.95             | (-2.15, 0.25)  | 0.12    |

**eTable 6. Linear Mixed-Effects Analyses—All Outcomes, Three Groups (Continued)**

| SRS Autistic Mannerisms<br>(Prespecified secondary outcome) | Unadjusted       |               |         | Adjusted for site |                |         |
|-------------------------------------------------------------|------------------|---------------|---------|-------------------|----------------|---------|
|                                                             | Beta coefficient | CI            | P-value | Beta coefficient  | CI             | P-value |
| Intercept                                                   | 17.57            | (16.53, 18.6) | <0.001  | 17.63             | (15.99, 19.27) | <0.001  |
| High-intensity MT vs. standard care                         | 0.53             | (-1.27, 2.34) | 0.56    | 0.49              | (-1.21, 2.19)  | 0.57    |
| Low-intensity MT vs. standard care                          | 1.16             | (-0.63, 2.95) | 0.20    | 1.08              | (-0.62, 2.77)  | 0.21    |
| 2 months vs. BL                                             | 0.38             | (-0.48, 1.24) | 0.39    | 0.47              | (-0.39, 1.33)  | 0.28    |
| 5 months vs. BL                                             | 0.13             | (-0.7, 0.97)  | 0.76    | 0.2               | (-0.64, 1.03)  | 0.64    |
| 12 months vs. BL                                            | -0.19            | (-1.03, 0.65) | 0.66    | -0.12             | (-0.96, 0.72)  | 0.78    |
| (High-intensity MT vs. standard care) * (2 months vs. BL)   | -1.06            | (-2.52, 0.41) | 0.16    | -1.15             | (-2.61, 0.31)  | 0.12    |
| (Low-intensity MT vs. standard care) * (2 months vs. BL)    | -1.18            | (-2.59, 0.23) | 0.10    | -1.25             | (-2.66, 0.15)  | 0.08    |
| (High-intensity MT vs. standard care) * (5 months vs. BL)   | -1.84            | (-3.29, -0.4) | 0.01    | -1.93             | (-3.37, -0.48) | 0.009   |
| (Low-intensity MT vs. standard care) * (5 months vs. BL)    | -0.43            | (-1.8, 0.94)  | 0.54    | -0.5              | (-1.86, 0.87)  | 0.48    |
| (High-intensity MT vs. standard care) * (12 months vs. BL)  | -0.89            | (-2.36, 0.57) | 0.23    | -0.98             | (-2.44, 0.49)  | 0.19    |
| (Low-intensity MT vs. standard care) * (12 months vs. BL)   | -1.34            | (-2.75, 0.07) | 0.06    | -1.38             | (-2.79, 0.02)  | 0.06    |
|                                                             |                  |               |         |                   |                |         |

**eTable 6. Linear Mixed-Effects Analyses—All Outcomes, Three Groups (Continued)**

|                                                            | Unadjusted       |                |         | Adjusted for site |                |         |
|------------------------------------------------------------|------------------|----------------|---------|-------------------|----------------|---------|
|                                                            | Beta coefficient | CI             | P-value | Beta coefficient  | CI             | P-value |
| <b>ADOS Total (Post hoc outcome)</b>                       |                  |                |         |                   |                |         |
| Intercept                                                  | 17.37            | (16.56, 18.18) | <0.001  | 17.43             | (16.26, 18.6)  | <0.001  |
| High-intensity MT vs. standard care                        | 0.97             | (-0.44, 2.39)  | 0.18    | 0.94              | (-0.43, 2.31)  | 0.18    |
| Low-intensity MT vs. standard care                         | 0.33             | (-1.08, 1.73)  | 0.65    | 0.15              | (-1.21, 1.52)  | 0.83    |
| 2 months vs. BL                                            | -0.45            | (-1.11, 0.21)  | 0.19    | -0.4              | (-1.06, 0.26)  | 0.24    |
| 5 months vs. BL                                            | -1.08            | (-1.7, -0.46)  | <0.001  | -1.07             | (-1.69, -0.45) | <0.001  |
| 12 months vs. BL                                           | -2.03            | (-2.67, -1.39) | <0.001  | -2.01             | (-2.65, -1.37) | <0.001  |
| (High-intensity MT vs. standard care) * (2 months vs. BL)  | 0.2              | (-0.92, 1.32)  | 0.72    | 0.18              | (-0.94, 1.3)   | 0.75    |
| (Low-intensity MT vs. standard care) * (2 months vs. BL)   | 0.28             | (-0.8, 1.35)   | 0.61    | 0.25              | (-0.83, 1.32)  | 0.66    |
| (High-intensity MT vs. standard care) * (5 months vs. BL)  | -0.18            | (-1.24, 0.88)  | 0.74    | -0.19             | (-1.25, 0.87)  | 0.72    |
| (Low-intensity MT vs. standard care) * (5 months vs. BL)   | 0.37             | (-0.65, 1.4)   | 0.48    | 0.36              | (-0.66, 1.39)  | 0.49    |
| (High-intensity MT vs. standard care) * (12 months vs. BL) | 0.22             | (-0.87, 1.31)  | 0.70    | 0.2               | (-0.89, 1.29)  | 0.72    |
| (Low-intensity MT vs. standard care) * (12 months vs. BL)  | 0.44             | (-0.61, 1.5)   | 0.41    | 0.43              | (-0.63, 1.48)  | 0.43    |

**eTable 6. Linear Mixed-Effects Analyses—All Outcomes, Three Groups (Continued)**

| ADOS Language and Communication<br>(Post hoc outcome)      | Unadjusted          |                |             | Adjusted for site   |                |         |
|------------------------------------------------------------|---------------------|----------------|-------------|---------------------|----------------|---------|
|                                                            | Beta<br>coefficient | CI             | P-<br>value | Beta<br>coefficient | CI             | P-value |
| Intercept                                                  | 3.25                | (3.03, 3.48)   | <0.001      | 3.31                | (2.84, 3.78)   | <0.001  |
| High-intensity MT vs. standard care                        | 0.13                | (-0.27, 0.52)  | 0.53        | 0.1                 | (-0.25, 0.45)  | 0.58    |
| Low-intensity MT vs. standard care                         | 0.08                | (-0.31, 0.48)  | 0.67        | 0                   | (-0.36, 0.35)  | 0.98    |
| 2 months vs. BL                                            | -0.27               | (-0.5, -0.04)  | 0.02        | -0.23               | (-0.46, -0.01) | 0.04    |
| 5 months vs. BL                                            | -0.4                | (-0.62, -0.19) | <0.001      | -0.39               | (-0.6, -0.17)  | <0.001  |
| 12 months vs. BL                                           | -0.54               | (-0.76, -0.32) | <0.001      | -0.52               | (-0.74, -0.3)  | <0.001  |
| (High-intensity MT vs. standard care) * (2 months vs. BL)  | 0.25                | (-0.13, 0.64)  | 0.20        | 0.23                | (-0.16, 0.61)  | 0.25    |
| (Low-intensity MT vs. standard care) * (2 months vs. BL)   | 0.12                | (-0.26, 0.49)  | 0.54        | 0.09                | (-0.29, 0.46)  | 0.66    |
| (High-intensity MT vs. standard care) * (5 months vs. BL)  | 0.09                | (-0.28, 0.46)  | 0.62        | 0.07                | (-0.3, 0.44)   | 0.70    |
| (Low-intensity MT vs. standard care) * (5 months vs. BL)   | 0.16                | (-0.2, 0.51)   | 0.40        | 0.14                | (-0.22, 0.49)  | 0.45    |
| (High-intensity MT vs. standard care) * (12 months vs. BL) | 0.16                | (-0.22, 0.54)  | 0.41        | 0.13                | (-0.25, 0.51)  | 0.50    |
| (Low-intensity MT vs. standard care) * (12 months vs. BL)  | 0.17                | (-0.2, 0.53)   | 0.38        | 0.14                | (-0.23, 0.5)   | 0.46    |

**eTable 6. Linear Mixed-Effects Analyses—All Outcomes, Three Groups (Continued)**

| ADOS Reciprocal and Social Interaction<br>(Post hoc outcome) | Unadjusted       |                |         | Adjusted for site |                |         |
|--------------------------------------------------------------|------------------|----------------|---------|-------------------|----------------|---------|
|                                                              | Beta coefficient | CI             | P-value | Beta coefficient  | CI             | P-value |
| Intercept                                                    | 10.24            | (9.7, 10.78)   | <0.001  | 10.34             | (9.58, 11.1)   | <0.001  |
| High-intensity MT vs. standard care                          | 0.79             | (-0.15, 1.73)  | 0.10    | 0.76              | (-0.16, 1.67)  | 0.10    |
| Low-intensity MT vs. standard care                           | 0.19             | (-0.75, 1.12)  | 0.69    | 0.07              | (-0.84, 0.98)  | 0.87    |
| 2 months vs. BL                                              | -0.12            | (-0.6, 0.36)   | 0.64    | -0.09             | (-0.57, 0.39)  | 0.71    |
| 5 months vs. BL                                              | -0.5             | (-0.96, -0.05) | 0.03    | -0.5              | (-0.96, -0.05) | 0.03    |
| 12 months vs. BL                                             | -1.09            | (-1.56, -0.63) | <0.001  | -1.09             | (-1.56, -0.62) | <0.001  |
| (High-intensity MT vs. standard care) * (2 months vs. BL)    | -0.03            | (-0.85, 0.79)  | 0.95    | -0.04             | (-0.86, 0.78)  | 0.93    |
| (Low-intensity MT vs. standard care) * (2 months vs. BL)     | 0.11             | (-0.67, 0.9)   | 0.78    | 0.1               | (-0.69, 0.88)  | 0.81    |
| (High-intensity MT vs. standard care) * (5 months vs. BL)    | -0.34            | (-1.11, 0.44)  | 0.40    | -0.34             | (-1.11, 0.44)  | 0.40    |
| (Low-intensity MT vs. standard care) * (5 months vs. BL)     | 0.19             | (-0.57, 0.94)  | 0.63    | 0.19              | (-0.57, 0.94)  | 0.63    |
| (High-intensity MT vs. standard care) * (12 months vs. BL)   | 0.02             | (-0.78, 0.82)  | 0.96    | 0.01              | (-0.78, 0.81)  | 0.97    |
| (Low-intensity MT vs. standard care) * (12 months vs. BL)    | -0.03            | (-0.8, 0.74)   | 0.95    | -0.03             | (-0.8, 0.74)   | 0.94    |

**eTable 6. Linear Mixed-Effects Analyses—All Outcomes, Three Groups (Continued)**

| ADOS Restricted and Repetitive Behavior<br>(Post hoc outcome) | Unadjusted          |                  |             | Adjusted for site   |                    |         |
|---------------------------------------------------------------|---------------------|------------------|-------------|---------------------|--------------------|---------|
|                                                               | Beta<br>coefficient | CI               | P-<br>value | Beta<br>coefficient | CI                 | P-value |
| Intercept                                                     | 3.91                | (3.62, 4.2)      | <0.001      | 3.77                | (3.26, 4.29)       | <0.001  |
| High-intensity MT vs. standard care                           | 0.04                | (-0.47,<br>0.54) | 0.88        | 0.06                | (-0.41, 0.54)      | 0.79    |
| Low-intensity MT vs. standard care                            | 0.03                | (-0.47,<br>0.53) | 0.91        | 0.06                | (-0.42, 0.53)      | 0.81    |
| 2 months vs. BL                                               | -0.11               | (-0.4, 0.18)     | 0.47        | -0.09               | (-0.38, 0.2)       | 0.56    |
| 5 months vs. BL                                               | -0.21               | (-0.48,<br>0.07) | 0.14        | -0.2                | (-0.48, 0.07)      | 0.15    |
| 12 months vs. BL                                              | -0.48               | (-0.76, -0.2)    | 0.001       | -0.47               | (-0.75, -<br>0.18) | 0.001   |
| (High-intensity MT vs. standard care) * (2 months vs. BL)     | 0.03                | (-0.46,<br>0.53) | 0.89        | 0.04                | (-0.46, 0.53)      | 0.89    |
| (Low-intensity MT vs. standard care) * (2 months vs. BL)      | 0.08                | (-0.39,<br>0.56) | 0.74        | 0.07                | (-0.41, 0.54)      | 0.78    |
| (High-intensity MT vs. standard care) * (5 months vs. BL)     | 0.09                | (-0.37,<br>0.56) | 0.69        | 0.09                | (-0.37, 0.56)      | 0.70    |
| (Low-intensity MT vs. standard care) * (5 months vs. BL)      | 0.08                | (-0.38,<br>0.53) | 0.75        | 0.07                | (-0.38, 0.52)      | 0.76    |
| (High-intensity MT vs. standard care) * (12 months vs. BL)    | 0.12                | (-0.37, 0.6)     | 0.64        | 0.11                | (-0.37, 0.59)      | 0.65    |
| (Low-intensity MT vs. standard care) * (12 months vs. BL)     | 0.38                | (-0.08,<br>0.85) | 0.11        | 0.38                | (-0.09, 0.84)      | 0.11    |

**eTable 6. Linear Mixed-Effects Analyses—All Outcomes, Three Groups (Continued)**

| Quality of life, participant<br>(Post hoc outcome)         | Unadjusted          |                  |             | Adjusted for site   |                   |             |
|------------------------------------------------------------|---------------------|------------------|-------------|---------------------|-------------------|-------------|
|                                                            | Beta<br>coefficient | CI               | P-<br>value | Beta<br>coefficient | CI                | P-<br>value |
| Intercept                                                  | 71.13               | (68.67,<br>73.6) | <0.001      | 71.01               | (68.01,<br>74.01) | <0.001      |
| High-intensity MT vs. standard care                        | 1.55                | (-2.76, 5.85)    | 0.48        | 1.52                | (-2.72, 5.75)     | 0.48        |
| Low-intensity MT vs. standard care                         | 0.85                | (-3.44, 5.15)    | 0.70        | 0.75                | (-3.48, 4.98)     | 0.73        |
| 2 months vs. BL                                            | 1.83                | (-0.55, 4.21)    | 0.13        | 1.76                | (-0.62, 4.15)     | 0.15        |
| 5 months vs. BL                                            | 3.4                 | (1.12, 5.68)     | 0.004       | 3.4                 | (1.11, 5.68)      | 0.004       |
| 12 months vs. BL                                           | 4.9                 | (2.6, 7.21)      | <0.001      | 4.91                | (2.61, 7.22)      | <0.001      |
| (High-intensity MT vs. standard care) * (2 months vs. BL)  | -0.67               | (-4.78, 3.44)    | 0.75        | -0.64               | (-4.75, 3.47)     | 0.76        |
| (Low-intensity MT vs. standard care) * (2 months vs. BL)   | -0.08               | (-4.06, 3.89)    | 0.97        | -0.08               | (-4.05, 3.9)      | 0.97        |
| (High-intensity MT vs. standard care) * (5 months vs. BL)  | 4.4                 | (0.38, 8.43)     | 0.03        | 4.41                | (0.39, 8.44)      | 0.03        |
| (Low-intensity MT vs. standard care) * (5 months vs. BL)   | 1.37                | (-2.46, 5.2)     | 0.48        | 1.34                | (-2.49, 5.17)     | 0.50        |
| (High-intensity MT vs. standard care) * (12 months vs. BL) | 0.61                | (-3.45, 4.68)    | 0.77        | 0.62                | (-3.45, 4.69)     | 0.77        |
| (Low-intensity MT vs. standard care) * (12 months vs. BL)  | 0.21                | (-3.7, 4.13)     | 0.92        | 0.14                | (-3.78, 4.06)     | 0.94        |

**eTable 6. Linear Mixed-Effects Analyses—All Outcomes, Three Groups (Continued)**

| Quality of life, family<br>(Post hoc outcome)              | Unadjusted          |                   |             | Adjusted for site   |                   |         |
|------------------------------------------------------------|---------------------|-------------------|-------------|---------------------|-------------------|---------|
|                                                            | Beta<br>coefficient | CI                | P-<br>value | Beta<br>coefficient | CI                | P-value |
| Intercept                                                  | 68.02               | (65.25,<br>70.79) | <0.001      | 68.01               | (64.53,<br>71.48) | <0.001  |
| High-intensity MT vs. standard care                        | 0.73                | (-4.12, 5.58)     | 0.77        | 0.56                | (-4.22, 5.34)     | 0.82    |
| Low-intensity MT vs. standard care                         | 0.07                | (-4.74, 4.88)     | 0.98        | 0.07                | (-4.68, 4.82)     | 0.98    |
| 2 months vs. BL                                            | 2.01                | (-0.5, 4.52)      | 0.12        | 2.02                | (-0.49, 4.54)     | 0.12    |
| 5 months vs. BL                                            | 2.77                | (0.36, 5.18)      | 0.03        | 2.79                | (0.37, 5.2)       | 0.02    |
| 12 months vs. BL                                           | 3.55                | (1.1, 5.99)       | 0.005       | 3.56                | (1.11, 6)         | 0.005   |
| (High-intensity MT vs. standard care) * (2 months vs. BL)  | -1.85               | (-6.2, 2.5)       | 0.41        | -1.8                | (-6.15, 2.55)     | 0.42    |
| (Low-intensity MT vs. standard care) * (2 months vs. BL)   | -0.54               | (-4.72, 3.64)     | 0.80        | -0.54               | (-4.73, 3.64)     | 0.80    |
| (High-intensity MT vs. standard care) * (5 months vs. BL)  | 2.02                | (-2.22, 6.25)     | 0.35        | 2.06                | (-2.18, 6.3)      | 0.34    |
| (Low-intensity MT vs. standard care) * (5 months vs. BL)   | -0.02               | (-4.05, 4.01)     | 0.99        | -0.02               | (-4.06, 4.01)     | 0.99    |
| (High-intensity MT vs. standard care) * (12 months vs. BL) | -1.15               | (-5.48, 3.18)     | 0.60        | -1.13               | (-5.45, 3.2)      | 0.61    |
| (Low-intensity MT vs. standard care) * (12 months vs. BL)  | 0.72                | (-3.41, 4.85)     | 0.73        | 0.69                | (-3.44, 4.83)     | 0.74    |

*Abbreviations:* BL – Baseline; MT – music therapy.

*Measures:* ADOS – Autism Diagnostic Observation Schedule. Higher scores indicate greater severity. Possible range: Total 0-37; Social Affect 0-27; Language and Communication 0-9; Reciprocal Social Interaction 0-19; Restricted and Repetitive Behavior 0-10.

SRS – Social Responsiveness Scale. Higher scores indicate greater severity. Possible range: Total 0-195; Social Awareness 0-24; Social Cognition 0-36; Social Communication 0-66; Social Motivation 0-33; Autistic Mannerisms 0-36.

Quality of life, participant and family: Visual analog scale. Higher scores indicate better quality of life. Possible range: 0-100, where 0 indicates worst possible and 100 best possible quality of life.

*Explanation of the model:* Intercept – mean value in enhanced standard care at baseline. High/low-intensity music therapy vs. standard care – difference from Intercept if in high- or low-intensity music therapy. 2/5/12 months vs. BL – difference from baseline in enhanced standard care at 2, 5 or 12 months. (High/low-intensity music therapy vs. standard care) \* (2/5/12 months vs. BL) – interaction effect, representing the difference between high- or low-intensity music therapy and enhanced standard care change from baseline at 2, 5 or 12 months (i.e. the treatment effect). The beta coefficients can be added to predict values for each group and time point. For example, the value of the primary outcome in high-intensity music therapy at 5 months is  $13.49+0.91+(-0.91)+(-0.24)=13.25$ .
